# Supplementary material for: Homologs of the LapD-LapG c-di-GMP Effector System Control Biofilm Formation by Bordetella bronchiseptica
Source: PubMed Central journal article supplement (PMC4933386; doi:10.1371/journal.pone.0158752), 2016-07-05

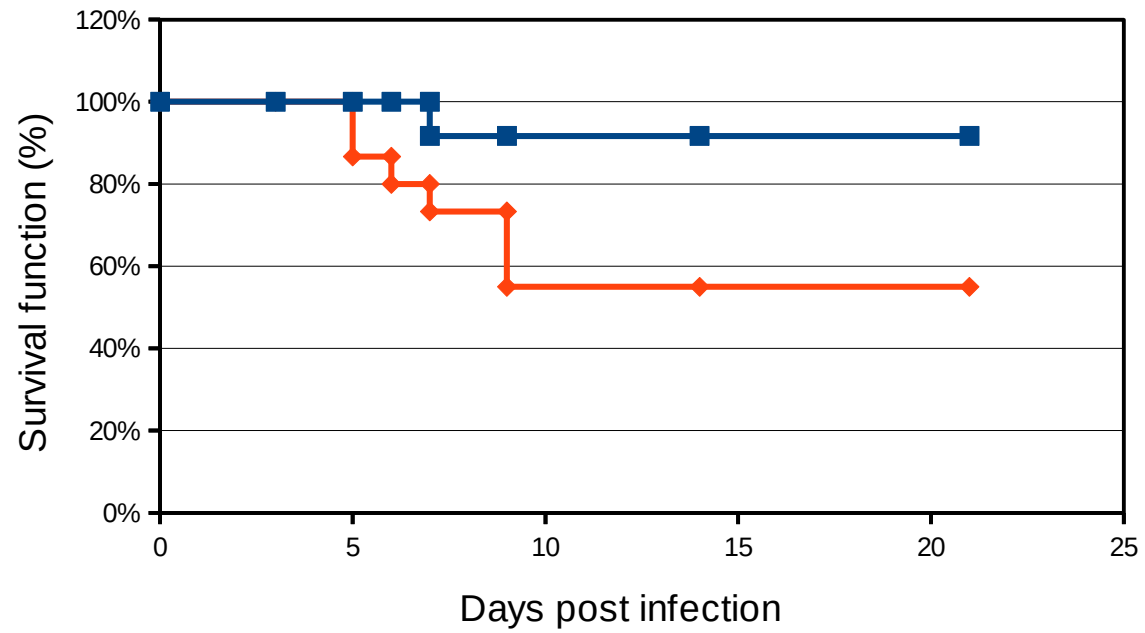

Supplement: pone.0158752.s003.pdf [file pone.0158752.s003.pdf]
